# Supplementary material for: Selective Inhibition of Type III Secretion Activated Signaling by the Salmonella Effector AvrA
Source: PubMed Central journal article supplement (PMC2742890; doi:10.1371/journal.ppat.1000595), 2009-09-25
Supplement: ppat.1000595.s004.pdf [file ppat.1000595.s004.pdf]

Table S1: Microarray analysis of the transcriptional responses induced by dif strains of *Salmonella Typhimurium*

| <b>Probe Set</b> | <b>Gene</b>  | <b>wild type</b> | <b><math>\Delta avrA</math></b> | <b>WT/<math>\Delta avrA</math></b> |
|------------------|--------------|------------------|---------------------------------|------------------------------------|
| 7959102          | HSPB8        | 1.7              | 3.1                             | 0.55                               |
| 8112198          | ACTBL2       | 1.7              | 2.9                             | 0.57                               |
| 7916609          | JUN          | 3.5              | 5.6                             | 0.62                               |
| 7931810          | KLF6         | 2.0              | 2.8                             | 0.70                               |
| 7943969          | HTR3A        | 1.7              | 2.3                             | 0.72                               |
| 7909610          | ATF3         | 1.6              | 2.2                             | 0.73                               |
| 8144526          | LOC100129150 | 1.9              | 2.6                             | 0.74                               |
| 8115831          | DUSP1        | 2.5              | 3.4                             | 0.74                               |
| 8084794          | IL1RAP       | 2.2              | 3.0                             | 0.75                               |
| 8029693          | FOSB         | 2.1              | 2.8                             | 0.75                               |
| 8070194          | RUNX1        | 1.5              | 2.0                             | 0.76                               |
| 8168345          | ACRC         | 1.6              | 2.1                             | 0.76                               |
| 7902687          | CYR61        | 2.7              | 3.5                             | 0.77                               |
| 8028652          | ZFP36/TTP    | 3.5              | 4.5                             | 0.78                               |
| 8104568          | UNQ1870      | 2.0              | 2.5                             | 0.78                               |
| 8108370          | EGR1         | 5.6              | 7.1                             | 0.79                               |
| 7912347          | CASZ1        | 1.8              | 2.3                             | 0.79                               |
| 8147344          | PPM2C        | 2.3              | 2.9                             | 0.79                               |
| 8040473          | RHOB         | 2.0              | 2.5                             | 0.80                               |
| 7919349          | ATG9B/APG9L2 | 2.0              | 2.5                             | 0.80                               |
| 8151816          | GEM          | 2.8              | 3.5                             | 0.80                               |
| 8086330          | AXUD1        | 4.3              | 5.4                             | 0.80                               |
| 8120335          | FAM83B       | 3.5              | 4.4                             | 0.81                               |
| 7997740          | MAP1LC3B     | 1.7              | 2.0                             | 0.81                               |
| 8132694          | IGFBP1       | 2.4              | 2.9                             | 0.82                               |
| 8024485          | GADD45B      | 2.1              | 2.5                             | 0.82                               |
| 8112841          | HOMER1       | 2.1              | 2.6                             | 0.82                               |
| 8105267          | ITGA2        | 2.9              | 3.5                             | 0.83                               |
| 8154381          | C9orf150     | 1.8              | 2.1                             | 0.83                               |
| 8148304          | TRIB1        | 3.0              | 3.6                             | 0.84                               |
| 8030128          | PPP1R15A     | 1.8              | 2.1                             | 0.84                               |
| 7917875          | F3           | 2.1              | 2.4                             | 0.84                               |
| 7927827          | MYPN         | 3.2              | 3.8                             | 0.84                               |
| 8129562          | CTGF/IGFBP8  | 2.0              | 2.4                             | 0.85                               |
| 8023727          | DSEL         | 2.4              | 2.8                             | 0.85                               |
| 7923967          | YOD1/DUBA8   | 1.8              | 2.1                             | 0.85                               |
| 7957260          | GLIPR1       | 2.7              | 3.2                             | 0.86                               |
| 8084880          | HES1         | 1.7              | 2.0                             | 0.86                               |
| 7938390          | ADM          | 2.2              | 2.5                             | 0.86                               |
| 7975779          | FOS          | 6.8              | 7.9                             | 0.86                               |
| 7912157          | ERRFI1/MIG-6 | 3.0              | 3.5                             | 0.86                               |
| 8052669          | SERTAD2      | 1.8              | 2.0                             | 0.87                               |
| 8100994          | CXCL2        | 13.6             | 15.7                            | 0.87                               |
| 7972055          | KCTD12       | 1.8              | 2.0                             | 0.87                               |
| 8103873          | snoRNA       | 2.3              | 2.7                             | 0.88                               |

|         |              |     |     |      |
|---------|--------------|-----|-----|------|
| 8113073 | ARRDC3       | 3.4 | 3.9 | 0.88 |
| 8179704 | IER3         | 2.3 | 2.7 | 0.88 |
| 8015387 | KRT17        | 2.7 | 3.0 | 0.88 |
| 8053668 | EIF2AK3      | 1.9 | 2.2 | 0.88 |
| 8119088 | CDKN1A       | 2.0 | 2.3 | 0.88 |
| 7992789 | TNFRSF12A    | 1.8 | 2.0 | 0.89 |
| 7936242 | KIAA1754     | 1.8 | 2.0 | 0.89 |
| 7912706 | EPHA2        | 2.3 | 2.5 | 0.89 |
| 8157216 | UGCG         | 2.3 | 2.6 | 0.90 |
| 7922610 | ABL2/ARG     | 2.1 | 2.4 | 0.90 |
| 7958202 | CHST11       | 2.4 | 2.6 | 0.91 |
| 8005449 | KRT17        | 2.2 | 2.5 | 0.91 |
| 8095680 | IL8          | 4.3 | 4.8 | 0.91 |
| 7919743 | C1orf138     | 1.8 | 2.0 | 0.91 |
| 8178435 | IER3         | 2.4 | 2.6 | 0.91 |
| 8047161 | OBFC2A       | 5.6 | 6.1 | 0.91 |
| 8081386 | NFKBIZ       | 3.4 | 3.7 | 0.91 |
| 7954065 | GPRC5A       | 2.0 | 2.2 | 0.91 |
| 8055688 | RND3         | 2.4 | 2.6 | 0.91 |
| 8149264 | PPP1R3B      | 2.1 | 2.2 | 0.92 |
| 8013042 | KRT17        | 2.3 | 2.4 | 0.92 |
| 7955589 | NR4A1        | 2.6 | 2.8 | 0.92 |
| 8005847 | TNFAIP1      | 1.8 | 2.0 | 0.92 |
| 8112615 | ENC1         | 1.9 | 2.1 | 0.92 |
| 8122807 | AKAP12       | 1.9 | 2.1 | 0.93 |
| 7974047 | SSTR1        | 2.0 | 2.1 | 0.93 |
| 8084206 | B3GNT5       | 1.8 | 2.0 | 0.93 |
| 8149749 | TNFRSF10D    | 2.1 | 2.3 | 0.93 |
| 8064766 | RNF24        | 1.9 | 2.1 | 0.93 |
| 8066513 | SDC4         | 2.0 | 2.1 | 0.93 |
| 8106403 | F2RL1/PAR2   | 4.4 | 4.8 | 0.93 |
| 8166469 | SAT1         | 2.3 | 2.5 | 0.94 |
| 8044301 | ANKRD57      | 1.9 | 2.1 | 0.94 |
| 7930413 | DUSP5        | 2.2 | 2.3 | 0.94 |
| 7927631 | DKK1         | 3.3 | 3.5 | 0.94 |
| 8129677 | SGK1         | 2.7 | 2.8 | 0.95 |
| 8117106 | RNF144B      | 2.3 | 2.4 | 0.95 |
| 8021470 | PMAIP1/NOXA  | 2.6 | 2.7 | 0.95 |
| 8015016 | TNS4         | 2.2 | 2.4 | 0.95 |
| 8011193 | C17orf91     | 2.1 | 2.2 | 0.95 |
| 8105040 | OSMR         | 2.5 | 2.6 | 0.95 |
| 7908409 | RGS2         | 3.1 | 3.3 | 0.95 |
| 8163896 | STOM         | 2.0 | 2.1 | 0.96 |
| 8116418 | GFPT2        | 2.9 | 3.1 | 0.96 |
| 8044080 | SLC9A2       | 1.9 | 2.0 | 0.96 |
| 8095728 | EREG         | 3.2 | 3.3 | 0.96 |
| 8088745 | FRMD4B/GRSP1 | 4.8 | 5.0 | 0.96 |
| 8121277 | AIM1         | 2.2 | 2.2 | 0.96 |
| 8095744 | AREG         | 9.5 | 9.9 | 0.96 |

|         |              |      |      |      |
|---------|--------------|------|------|------|
| 7943998 | NNMT         | 3.2  | 3.3  | 0.96 |
| 8091515 | GPR87        | 3.2  | 3.3  | 0.96 |
| 7919751 | MCL1         | 2.3  | 2.3  | 0.96 |
| 8116818 | BMP6         | 1.9  | 2.0  | 0.96 |
| 8042942 | HK2          | 2.3  | 2.4  | 0.97 |
| 8094520 | PCDH7        | 2.9  | 2.9  | 0.97 |
| 8025828 | LDLR         | 1.9  | 2.0  | 0.97 |
| 7916493 | PPAP2B       | 2.1  | 2.2  | 0.97 |
| 7986383 | IGF1R        | 2.1  | 2.2  | 0.97 |
| 7908312 | PRG4         | 2.9  | 3.0  | 0.97 |
| 8162276 | NFIL3        | 5.0  | 5.2  | 0.98 |
| 8096116 | AGPAT9       | 2.1  | 2.1  | 0.98 |
| 7985934 | SEMA4B       | 2.4  | 2.5  | 0.98 |
| 8026047 | JUNB         | 5.4  | 5.5  | 0.98 |
| 8109773 | WWC1         | 2.0  | 2.1  | 0.98 |
| 8023735 | TXNDC10      | 2.2  | 2.2  | 0.99 |
| 8065071 | FLRT3        | 3.4  | 3.5  | 0.99 |
| 8041781 | EPAS1        | 2.0  | 2.0  | 0.99 |
| 7965357 | GALNT4       | 2.0  | 2.0  | 0.99 |
| 8005785 | KSR1         | 2.1  | 2.1  | 0.99 |
| 8147112 | CA13         | 3.0  | 3.0  | 0.99 |
| 7964834 | CPM          | 2.5  | 2.5  | 0.99 |
| 7982868 | CHAC1        | 2.2  | 2.2  | 0.99 |
| 8095723 | EPGN         | 3.5  | 3.5  | 0.99 |
| 8161701 | TMEM2        | 3.6  | 3.6  | 1.00 |
| 8023688 | SERPINB3(4)  | 18.3 | 18.4 | 1.00 |
| 8006433 | CCL2/MCP1    | 30.4 | 30.5 | 1.00 |
| 8148184 | FAM83A       | 2.3  | 2.3  | 1.00 |
| 7933084 | NAMPT        | 2.2  | 2.2  | 1.00 |
| 8068593 | ETS2         | 2.5  | 2.4  | 1.00 |
| 7906400 | IFI16        | 3.3  | 3.3  | 1.00 |
| 8150592 | CEBPD        | 3.4  | 3.4  | 1.01 |
| 8111677 | LIFR         | 2.0  | 2.0  | 1.01 |
| 8018864 | SOCS3        | 6.2  | 6.1  | 1.01 |
| 7926900 | MAP3K8/Tpl-2 | 2.3  | 2.3  | 1.01 |
| 8142120 | NAMPT        | 2.2  | 2.1  | 1.01 |
| 8072710 | APOL6        | 2.9  | 2.8  | 1.02 |
| 8067113 | ZNF217       | 2.3  | 2.2  | 1.02 |
| 7967322 | GPR109B      | 2.4  | 2.4  | 1.02 |
| 8130556 | SOD2         | 2.3  | 2.2  | 1.02 |
| 8136115 | FAM40B       | 2.4  | 2.3  | 1.03 |
| 8123598 | SERPINB1     | 2.6  | 2.5  | 1.03 |
| 8097910 | FGB          | 11.8 | 11.5 | 1.03 |
| 8077441 | BHLHB2       | 2.4  | 2.3  | 1.03 |
| 7925062 | SIPA1L2      | 2.1  | 2.1  | 1.03 |
| 7965040 | PHLDA1       | 2.7  | 2.7  | 1.03 |
| 7978644 | NFKBIA       | 2.0  | 2.0  | 1.04 |
| 8069553 | NRIP1        | 2.4  | 2.3  | 1.04 |
| 8066214 | TGM2         | 2.1  | 2.0  | 1.04 |

|         |              |      |      |      |
|---------|--------------|------|------|------|
| 8140840 | STEAP4       | 2.3  | 2.2  | 1.05 |
| 8114010 | IRF1         | 4.4  | 4.2  | 1.05 |
| 8077851 | HRH1         | 2.9  | 2.7  | 1.06 |
| 8103311 | FGA          | 8.3  | 7.8  | 1.06 |
| 8025601 | ICAM1        | 2.9  | 2.7  | 1.06 |
| 8062461 | LBP          | 2.4  | 2.2  | 1.06 |
| 7943413 | BIRC3        | 2.2  | 2.1  | 1.06 |
| 7994280 | IL4R         | 3.2  | 3.0  | 1.06 |
| 8091327 | PLSCR1       | 2.3  | 2.1  | 1.08 |
| 7926677 | OTUD1/DUBA7  | 2.2  | 2.0  | 1.08 |
| 7922976 | PTGS2/COX2   | 5.2  | 4.8  | 1.08 |
| 8121257 | PRDM1        | 2.5  | 2.3  | 1.08 |
| 7922717 | RGS16        | 2.6  | 2.4  | 1.08 |
| 7931353 | PTPRE        | 2.1  | 2.0  | 1.09 |
| 8122265 | TNFAIP3/A20  | 3.4  | 3.1  | 1.09 |
| 7957551 | SOCS2        | 2.4  | 2.2  | 1.09 |
| 8117840 | TRIM40/RNF35 | 3.4  | 3.1  | 1.09 |
| 7944769 | GRAMD1B      | 3.6  | 3.3  | 1.10 |
| 7904361 | FAM46C       | 2.7  | 2.5  | 1.10 |
| 8177750 | TRIM40/RNF35 | 2.9  | 2.6  | 1.10 |
| 7968236 | RASL11A      | 2.5  | 2.3  | 1.10 |
| 8019486 | SECTM1       | 3.4  | 3.0  | 1.11 |
| 8043995 | IL1R1        | 5.6  | 5.0  | 1.11 |
| 8012949 | FBXW10       | 3.0  | 2.7  | 1.12 |
| 8023696 | SERPINB3     | 48.9 | 42.3 | 1.16 |
| 8061564 | ID1          | 3.1  | 2.6  | 1.18 |
| 8122365 | GPR126       | 2.9  | 2.5  | 1.19 |
| 8054712 | IL1A         | 2.7  | 2.2  | 1.20 |
| 7905929 | EFNA1        | 2.6  | 2.1  | 1.25 |
| 7946983 | SAA2         | 2.9  | 2.3  | 1.29 |
| 7965335 | DUSP6        | 2.9  | 2.2  | 1.33 |
| 8103326 | FGG          | 10.5 | 7.4  | 1.41 |
|         |              |      |      |      |
